# Supplementary material
Source: ML conference proceedings conference paper supplement (https://openaccess.thecvf.com/content/CVPR2026/html/Xiong_No_Way_To_CVPR_2026_paper.html)
Supplement: Supplementary file 1 [file Xiong_No_Way_To_CVPR_2026_supplemental.pdf]

# No Way To Steal My Face: Proactive Defense Against Identity-Preserving Personalized Generation

## Supplementary Material

### A. Methodological and Evaluation Details

While the main paper introduces the two-stage defense principle of **IDGuardian**, this section provides the complete algorithmic details of its optimization process. Specifically, IDGuardian jointly optimizes adversarial perturbations through two complementary strategies—**Cross-Encoder Identity Field Confounding** and **Guidance-Flow Identity Deflection**—which correspond to the disruption of identity extraction and injection, respectively. For clarity and reproducibility, we detail the optimization objectives, loss composition, and implementation settings that were omitted for brevity in the main text.

#### A.1. Optimization Process of IDGuardian

Our defense operates in the latent denoising space of the pretrained SDXL backbone within the IP-Adapter SDXL Plus Face pipeline, and optimizes an adversarial perturbation  $\delta$  on the input image  $x$ , such that the final protected image  $x_{\text{adv}} = x + \delta$  preserves perceptual quality while significantly reducing identity consistency in downstream personalized generation.

The optimization is carried out iteratively over  $N_{\text{iter}}$  steps. At each step:

- The input clean image is encoded into the latent space using the VAE encoder.
- A random diffusion timestep  $t$  is sampled, and corresponding noise is added to simulate a forward noisy latent  $x_t$ .
- Identity embeddings are computed from the clean and perturbed versions of the input, and serve as conditioning inputs for the UNet during denoising.
- Two complementary gradients are computed: i) the identity loss gradient  $\nabla_{\delta} \mathcal{L}_{\text{ID}}$  based on FaceNet and CLIP similarity; ii) a distributional score gradient  $S^*$ , which measures the semantic divergence between adversarial and clean identity trajectories in diffusion space.
- To match the spatial resolution and RGB channels of the perturbation,  $S^*$  is upsampled via bilinear interpolation (PyTorch: `F.interpolate(..., mode='bilinear', align_corners=False)`) and only the first three channels (RGB) are retained to align with the perturbation tensor.
- These gradients are normalized and combined to update  $\delta$  via a projected gradient descent step, bounded by the perturbation constraint  $\|\delta\|_{\infty} < \epsilon$ .

Algorithm 1 outlines the full optimization pipeline. This instantiation reflects a synergy between semantic feature-space objectives and internal generative guidance dynamics,

ensuring that the optimization is both perceptually aware and diffusion-aligned.

---

#### Algorithm 1 IDGuardian

---

- 1: **Input:** original image  $x$ , perturbation budget  $\epsilon$ , learning rate  $\alpha$ , text prompt  $y$ , max steps  $N_{\text{iter}}$
  - 2: **Output:** optimized adversarial image  $x_{\text{adv}}$
  - 3: Load pretrained **IP-Adapter SDXL Plus Face** pipeline components: VAE Encoder, UNet, and CLIP image encoder
  - 4: Encode image into latent space:  $x_0 \leftarrow \text{VAE\_Encoder}(x)$
  - 5: Initialize perturbation  $\delta \leftarrow 0$
  - 6: **for**  $i = 1$  to  $N_{\text{iter}}$  **do**
  - 7:   Sample random timestep  $t$ , corresponding noise  $\epsilon_t$
  - 8:   Compute noisy latent:  $x_t \leftarrow \text{AddNoise}(x_0, \epsilon_t, t)$
  - 9:    $x_{\text{adv}} \leftarrow \text{clip}(x + \delta, 0, 1)$
  - 10:   Compute embeddings:  $\text{CLIP}(x), \text{CLIP}(x_{\text{adv}})$
  - 11:   Predict denoising outputs:
  - 12:      $\hat{\epsilon}_{\text{clean}} \leftarrow \text{UNet}(x_t, t, \text{CLIP}(x), y)$
  - 13:      $\hat{\epsilon}_{\text{adv}} \leftarrow \text{UNet}(x_t, t, \text{CLIP}(x_{\text{adv}}), y)$
  - 14:   Compute score gradient:
  - 15:      $S^* \leftarrow -\frac{1}{\sqrt{1-\alpha_t}} \cdot (\hat{\epsilon}_{\text{adv}} - \hat{\epsilon}_{\text{clean}})$
  - 16:   Upsample  $S^*$  to image resolution using bilinear interpolation and align channels with RGB:
  - 17:      $S_{\text{up}}^* \leftarrow \text{BilinearUp}(S^*, \text{size} = x.\text{shape})[:, :3, :, :]$
  - 18:   Compute identity loss gradient:  $\nabla_{\delta} \mathcal{L}_{\text{ID}}$
  - 19:   Combine gradients:
  - 20:      $\text{total\_grad} \leftarrow \text{Normalize}(\nabla_{\delta} \mathcal{L}_{\text{ID}}) - \text{Normalize}(S_{\text{up}}^*)$
  - 21:   Update perturbation:  $\delta \leftarrow \delta - \alpha \cdot \text{sign}(\text{total\_grad})$
  - 22:   Clip:  $\delta \leftarrow \text{clip}(\delta, -\epsilon, \epsilon)$
  - 23: **end for**
  - 24: **Return**  $x_{\text{adv}} = x + \delta = 0$
- 

#### A.2. DreamBooth Fine-Tuning and Similarity Evaluation

For DreamBooth and other training-based methods, which typically require multiple images per identity for fine-tuning, we provide four distinct images per identity. For each generated image of that identity, we compute its similarity to each of the four original images, yielding four similarity scores. We then average these four scores to obtain a single similarity metric for that generated image. This procedure is repeated for all generated images of the identity, and the final reported similarity is obtained by averaging across all generated images. This ensures that the evaluation reflects the model’s performance using all available reference images rather than relying on a single image.

### A.3. Reproducibility Resources

For reproducibility, we list the main public resources used in this work:

- **FaceNet implementation:** We adopt the official FaceNet implementation from the GitHub repository [davidsandberg / facenet](https://github.com/davidsandberg/facenet), using the *Inception-ResNet-v1* checkpoint with identifier 20180402-114759 in our loss computation.
- **Evaluation toolkit:** We use the public DeepFace toolkit from the GitHub repository [serengil/deepface](https://github.com/serengil/deepface) for identity similarity evaluation.
- **Datasets:** The VGGFace2 dataset is accessed from the HuggingFace repository [datasets / ProgramComputer / VGGFace2](https://huggingface.co/datasets/ProgramComputer/VGGFace2). The CelebA-HQ dataset is obtained from the GitHub repository [IIGROUP/MM-CelebA-HQ-Dataset](https://github.com/IIGROUP/MM-CelebA-HQ-Dataset).

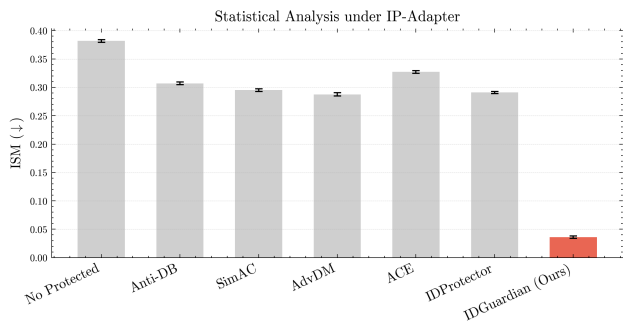

Figure 1. Statistical analysis of identity similarity (ISM) under IP-Adapter. Error bars denote the variability across repeated runs.

## B. Detailed Quantitative Results

### B.1. Comparative Evaluation with Baselines

In the main paper, we summarized the performance of IDGuardian against baseline methods using average identity similarity scores and a representative perceptual quality metric. Here, we provide comprehensive quantitative results for all individual identity similarity metrics (ArcFace, FaceNet, VGGFace) and perceptual quality metrics (FaceQNet, MagFace) across the tested methods. Table 3 and Table 4 present detailed comparisons highlighting the consistent superiority of IDGuardian in identity suppression and its effectiveness in preserving perceptual quality.

We further include statistical analysis results, demonstrating that the observed performance gains remain stable and consistent across repeated runs. Taking IP-Adapter as an example, as shown in Figure 1, IDGuardian exhibits consistently lower identity similarity with small variance compared to baseline methods.

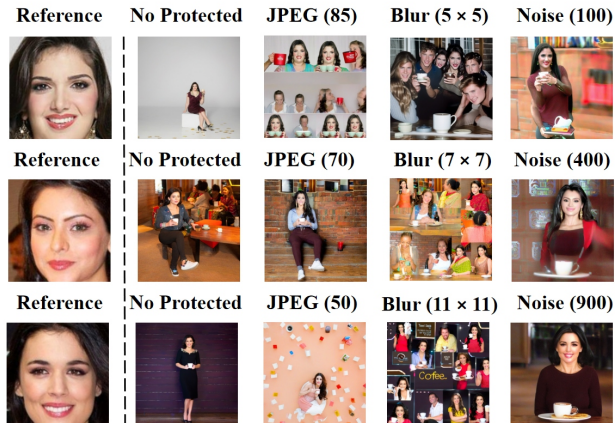

Figure 2. Visual results under three levels of JPEG compression, Gaussian blur, and Gaussian noise, showing that our protection mechanism remains effective even under stronger distortions.

### B.2. Ablation Study on Identity Similarity and Perceptual Quality Metrics

We further expand the ablation study presented in the main paper by showing the full set of identity similarity metrics and perceptual quality metrics across various ablation configurations. Tables 5 and 6 provide detailed insights into the contributions of different identity encoder combinations and adversarial conceptual bridge. These results validate the complementary roles of identity supervision and conceptual bridge in enhancing identity suppression, where visual degradation is part of the intended defense effect.

### B.3. Robustness Evaluation Settings.

To evaluate the robustness of our protection mechanism, we applied three types of distortions to the protected images: JPEG compression, Gaussian blur, and Gaussian noise. Specifically, we used JPEG compression with a quality factor of 85, Gaussian blur with a kernel size of  $5 \times 5$  and  $\sigma = 1.5$ , and noise perturbation with a variance of 100. These parameters were selected to simulate common post-processing or transmission degradations while maintaining perceptual plausibility. As illustrated in Figure 5 of the main text, the protection performance under these distortions remains comparable to that on undistorted inputs, demonstrating that our method exhibits strong robustness against typical image degradations. To further evaluate the robustness, we conducted additional experiments with stronger distortions. Specifically, we tested two additional levels of perturbations: JPEG compression with quality factors of 70 and 50, Gaussian blur with kernel sizes of  $7 \times 7$  and  $11 \times 11$  (both with  $\sigma = 1.5$ ), and Gaussian noise with variances of 400 and 900. Table 1 summarizes the results, demonstrating that our method maintains protection performance even under these more severe image degradations.

Table 1. Robustness evaluation under different distortion levels. The results are reported on Ip-Adapter Plus XL as an example.

| No Protected |        |        | JPEG (85) |        |        | Blur (5 × 5, 1.5)   |        |        | Noise (100) |        |        |
|--------------|--------|--------|-----------|--------|--------|---------------------|--------|--------|-------------|--------|--------|
| Arc ↓        | Face ↓ | VGG ↓  | Arc ↓     | Face ↓ | VGG ↓  | Arc ↓               | Face ↓ | VGG ↓  | Arc ↓       | Face ↓ | VGG ↓  |
| 0.4985       | 0.6899 | 0.5573 | 0.3209    | 0.3983 | 0.3006 | 0.3317              | 0.4443 | 0.3520 | 0.3078      | 0.3970 | 0.3113 |
| No Protected |        |        | JPEG (70) |        |        | Blur (7 × 7, 1.5)   |        |        | Noise (400) |        |        |
| Arc ↓        | Face ↓ | VGG ↓  | Arc ↓     | Face ↓ | VGG ↓  | Arc ↓               | Face ↓ | VGG ↓  | Arc ↓       | Face ↓ | VGG ↓  |
| 0.4985       | 0.6899 | 0.5573 | 0.3520    | 0.4863 | 0.3730 | 0.3303              | 0.4473 | 0.3338 | 0.3955      | 0.4778 | 0.3746 |
| No Protected |        |        | JPEG (50) |        |        | Blur (11 × 11, 1.5) |        |        | Noise (900) |        |        |
| Arc ↓        | Face ↓ | VGG ↓  | Arc ↓     | Face ↓ | VGG ↓  | Arc ↓               | Face ↓ | VGG ↓  | Arc ↓       | Face ↓ | VGG ↓  |
| 0.4985       | 0.6899 | 0.5573 | 0.3426    | 0.4606 | 0.3382 | 0.3416              | 0.4728 | 0.3632 | 0.3094      | 0.4495 | 0.3604 |

As illustrated in Figure 2, we also provide visual comparisons under three levels of post-processing strength, showing that the perceptual quality of the protected images remains largely preserved despite the increased distortions.

#### B.4. Robustness Evaluation on Identity Similarity and Perceptual Quality Metrics

Robustness experiments are conducted under both common image degradations (JPEG compression, Gaussian blur, and additive noise) and adaptive defense-aware attacks such as Impress, which is explicitly designed to circumvent identity protection mechanisms. As shown in Tables 7 and 8, IDGuardian maintains low identity similarity scores across all perturbation types, while perceptual quality metrics naturally decline under heavy input distortion. These results demonstrate that our method retains strong protection capability even under adverse conditions. Qualitative examples in Figure 8 further support these findings by illustrating that identity-relevant features remain suppressed even under various post-processing transformations. These detailed robustness results complement the summary metrics presented in the main paper and underscore IDGuardian’s practical effectiveness in real-world usage scenarios.

### C. Additional Ablation Study

#### C.1. Visualization of the Main Ablation Results

To further validate the effectiveness of our proposed identity guidance strategy and loss function design, we provide an additional visualization of the ablation results in Figure 9. The figure clearly demonstrates the influence of different identity loss combinations and guidance directions on the overall performance. Consistent with the quantitative results in Table 4 of the main text, IDGuardian achieves superior identity protection while maintaining high visual quality.

#### C.2. Perturbation Budget and Learning Rate

We perform a grid search over the perturbation magnitude  $\epsilon$  and learning rate  $\alpha$  to determine an optimal trade-off between identity consistency suppression and perceptual quality. Specifically, we evaluate the following five configurations:

- $\alpha = 0.005, \epsilon = 4/255$
- $\alpha = 0.005, \epsilon = 8/255$
- $\alpha = 0.005, \epsilon = 16/255$
- $\alpha = 0.001, \epsilon = 8/255$
- $\alpha = 0.01, \epsilon = 8/255$

As depicted in Figure 3, the configuration  $\alpha = 0.005, \epsilon = 8/255$  achieves the best balance:

- It consistently reduces identity consistency below 0.15 across ArcFace, FaceNet, and VGGFace.
- It maintains high perceptual quality, with SSIM exceeding 0.8419 and PSNR surpassing 32.186 dB.

Smaller perturbations (e.g.,  $\epsilon = 4/255$ ) yield insufficient identity suppression, while larger ones (e.g.,  $\epsilon = 16/255$ ) compromise visual fidelity. Similarly, extremely small learning rates ( $\alpha = 0.001$ ) lead to under-optimization, whereas large values ( $\alpha = 0.01$ ) introduce instability and visual artifacts. These observations underscore the importance of jointly tuning the perturbation magnitude and step size, as a delicate balance is required to ensure both identity confusion and natural-looking outputs.

#### C.3. Number of Optimization Steps

We investigate the convergence behavior of identity loss over a range of optimization steps, up to 1000 iterations. As shown in Figure 4, the identity loss declines rapidly during the initial 100 steps, indicating early-stage effectiveness in suppressing identity-related features. To illustrate optimization dynamics more clearly, we apply a shaded band using

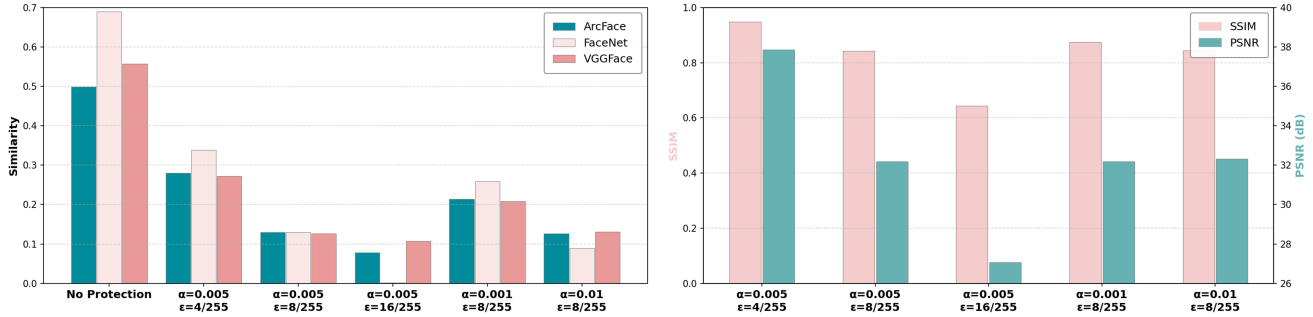

Figure 3. Grid search results for perturbation budget  $\epsilon$  and learning rate  $\alpha$ . The configuration  $\alpha = 0.005$ ,  $\epsilon = 8/255$  achieves the best trade-off between identity suppression (measured by ArcFace, FaceNet, and VGGFace similarity) and perceptual quality (SSIM and PSNR).

Table 2. Identity Suppression Performance Across Surrogate Generative Models. The metrics Arc, Face, and VGG correspond to identity similarity scores computed by the face recognition models ArcFace, FaceNet, and VGGFace, respectively.

| Method                  | Ip-Adapter    |               |               | Ip-Adapter Plus XL |               |               | Blip-Diffusion |               |               | InfiniteID    |               |               |
|-------------------------|---------------|---------------|---------------|--------------------|---------------|---------------|----------------|---------------|---------------|---------------|---------------|---------------|
|                         | Arc ↓         | Face ↓        | VGG ↓         | Arc ↓              | Face ↓        | VGG ↓         | Arc ↓          | Face ↓        | VGG ↓         | Arc ↓         | Face ↓        | VGG ↓         |
| No Protected            | 0.3369        | 0.4774        | 0.3308        | 0.4985             | 0.6899        | 0.5573        | 0.3305         | 0.3918        | 0.2848        | 0.6345        | 0.7627        | 0.6286        |
| <b>IDGuardian-SD1.5</b> | <b>0.0425</b> | <b>0.0119</b> | <b>0.0650</b> | <b>0.1589</b>      | <b>0.1413</b> | <b>0.1403</b> | <b>0.2670</b>  | <b>0.2550</b> | <b>0.2204</b> | <b>0.4338</b> | <b>0.4989</b> | <b>0.4113</b> |
| Method                  | Photomaker    |               |               | Dreambooth         |               |               | InfiniteYou    |               |               | Mean          |               |               |
|                         | Arc ↓         | Face ↓        | VGG ↓         | Arc ↓              | Face ↓        | VGG ↓         | Arc ↓          | Face ↓        | VGG ↓         | Arc ↓         | Face ↓        | VGG ↓         |
| No Protected            | 0.3488        | 0.3513        | 0.2806        | 0.4681             | 0.6580        | 0.4477        | 0.6788         | 0.7554        | 0.5847        | 0.4708        | 0.5838        | 0.4450        |
| <b>IDGuardian-SD1.5</b> | <b>0.1353</b> | <b>0.1556</b> | <b>0.2233</b> | <b>0.2907</b>      | <b>0.3940</b> | <b>0.3455</b> | <b>0.3328</b>  | <b>0.3573</b> | <b>0.2809</b> | <b>0.2373</b> | <b>0.2591</b> | <b>0.2409</b> |

`fill_between`<sup>1</sup> to visualize artificial fluctuation bounds around the loss curve. This is not a confidence interval but a heuristic indicator of stability and oscillation patterns.

The loss saturates around 200 iterations, beyond which further gains become marginal. Based on this trend, we adopt  $N_{\text{iter}} = 200$  as the default number of steps in our experiments, ensuring adequate convergence without excessive computation.

## D. Generalization Analysis

### D.1. Evaluation on Commercial Face Personalization APIs

To further validate the generalization ability of our protection method, we conducted additional evaluations on several commercial face personalization APIs, including *Seedream 4.0*, *Owen-Image*, *Kling-AI*, and *Ihuiwa*. As shown

<sup>1</sup>`fill_between` is a Matplotlib function that fills the area between two curves, allowing visual emphasis on regions such as fluctuation bounds. In this context, it is used to highlight the range of  $\pm 0.1$  around the loss curve to help visualize the stability and oscillation of the optimization process.

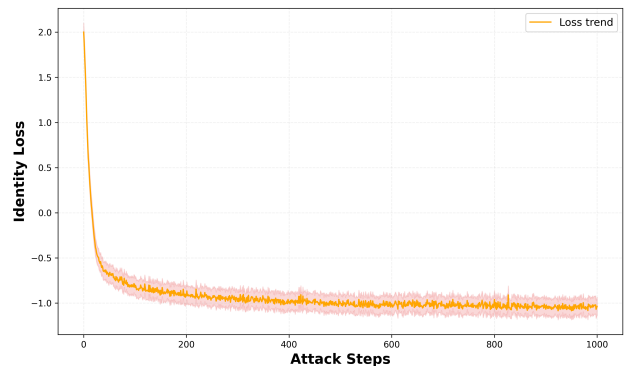

Figure 4. Identity loss convergence over optimization steps with shaded band indicating fluctuation bounds ( $\pm 0.1$ ) around the mean curve. The identity loss stabilizes after approximately 200 steps, guiding the selection of the default iteration count.

in Figure 5, our method still provides a certain degree of defense under these black-box conditions, demonstrating its robustness and transferability beyond the training environ-

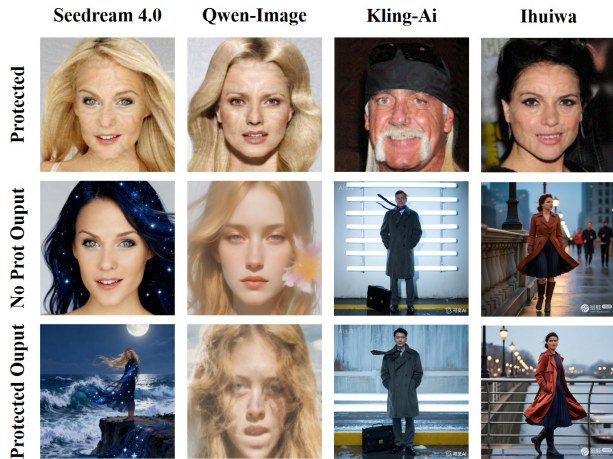

Figure 5. Visualization of generalization results on commercial face personalization APIs.

ment.

## D.2. Flexibility in Surrogate Selection

To evaluate the generalizability of our approach at the model level, we replace the surrogate model used for adversarial optimization with a significantly different generative backbone. Our main experiments utilize the IP-Adapter SDXL Plus Face model based on Stable Diffusion XL (SDXL). Additionally, we assess our method on the earlier Stable Diffusion 1.5 (SD1.5) backbone along with its corresponding IP-Adapter variant. All attack configurations, including text prompts and optimization parameters, are held constant to ensure comparability.

The results demonstrate that the proposed method consistently achieves strong identity suppression across distinct surrogate models, confirming its robustness and applicability beyond specific model architectures, as summarized in Table 2. Representative visual results further illustrate the consistency and effectiveness of identity suppression across models, as shown in Figure 6.

## D.3. Dataset Generalization

In addition to the VGGFace2 dataset results presented in the main paper, we further evaluate the method on the high-resolution CelebA-HQ dataset. We employ multiple identity similarity metrics, namely ArcFace, FaceNet, and VGGFace, to measure the extent of identity removal across diverse personalized generation models. Perceptual quality is concurrently assessed through FaceQnet and MagFace to verify preservation of visual fidelity.

The quantitative results summarized in Table 9 and Table 10 indicate that the method maintains effective identity suppression and reduced perceptual quality on CelebA-HQ, thus demonstrating robustness across datasets varying

in resolution and demographic composition. As illustrated in Figure 10, the visual results confirm that the method successfully removes identity-specific features while preserving photorealism, supporting the effectiveness of the proposed defense. We further provide results on the LFW dataset using the identity similarity metric in Table 11. The results remain consistent with those on VGGFace2 and CelebA-HQ, further demonstrating the robustness and cross-dataset generalization ability of IDGuardian. Collectively, these experiments verify that IDGuardian consistently preserves identity suppression capability and visual quality across different surrogate model architectures and datasets, highlighting its strong generalization capability in diffusion-based personalized face generation.

## E. Human and GPT-Based Evaluation of Identity Protection Effectiveness

As illustrated in Figure 7, the upper part of the figure presents the results of the human perceptual study, while the lower part corresponds to the GPT-based evaluation. This joint visualization highlights the consistency between subjective human judgments and automated assessments, with our method favored in 92% of human responses and 94% of GPT comparisons across over 50 test cases, further reinforcing the effectiveness of our approach.

### E.1. Human Study

To further assess the effectiveness of identity protection from a human perceptual perspective, we conducted a comprehensive subjective evaluation involving human participants. These participants were tasked with rating the perceived identity similarity between the original identity images and the personalized images generated by our method as well as several state-of-the-art baseline methods. The results consistently demonstrate that images produced by our approach exhibit significantly lower perceived identity similarity compared to those generated by other methods, thereby indicating superior identity obfuscation. This extensive subjective evaluation complements the quantitative metrics by capturing nuanced perceptual differences and providing insights into human visual cognition that automated measures alone may not fully capture.

### E.2. GPT-Based Evaluation

In addition to the human evaluation, we also employed a state-of-the-art large multimodal language model, GPT, to automatically assess the identity protection performance. Given pairs of original and generated images, GPT was prompted to analyze and identify which generated image exhibits the greatest discrepancy in identity features relative to the original input. Leveraging GPT’s advanced visual-language reasoning capabilities, this automated evaluation

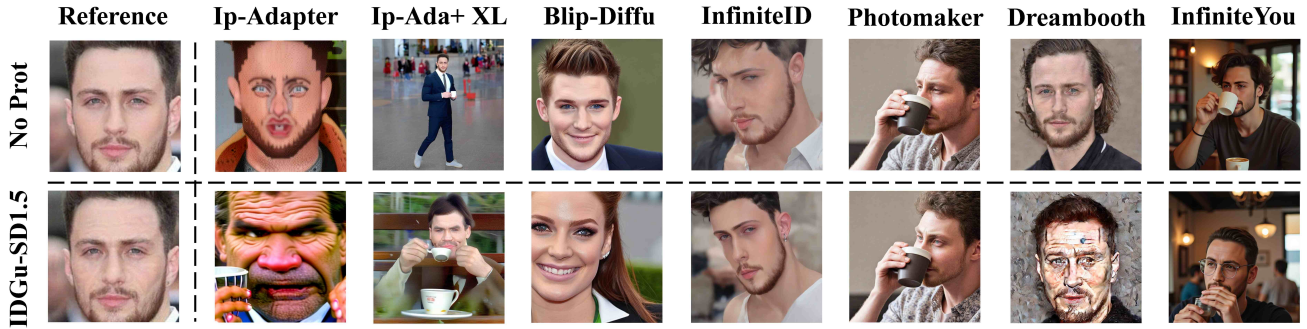

Figure 6. Visual comparison of identity suppression results across different surrogate generative models.

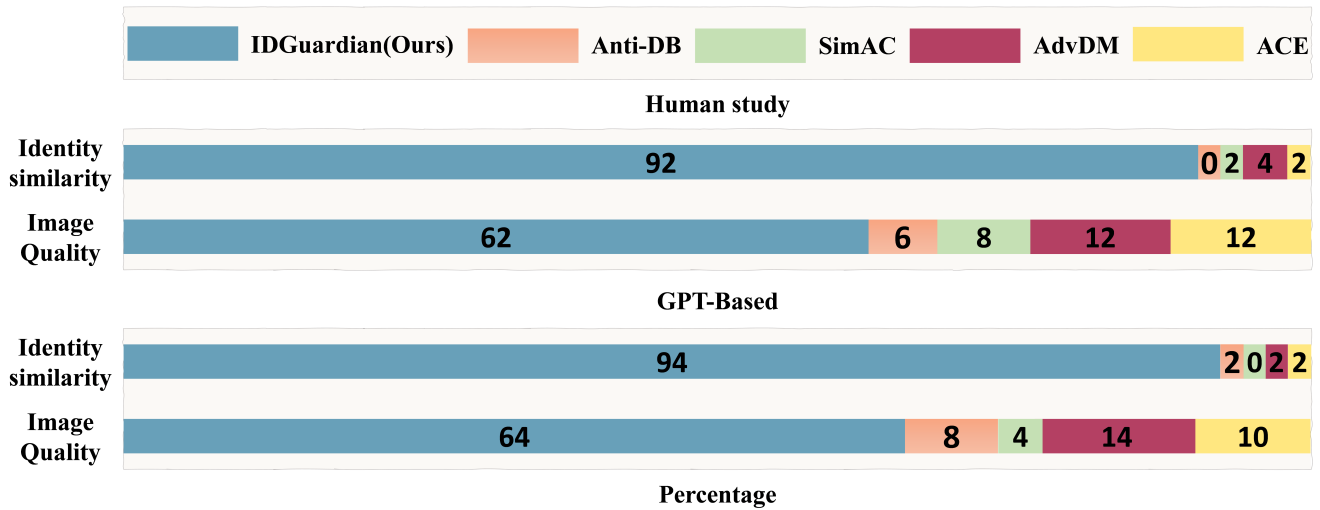

Figure 7. Comparison of Identity Protection Effectiveness Based on Human Perception and GPT-Based Evaluation.

approach offers a scalable and efficient complement to human judgment. The findings from the GPT-based evaluation are consistent with the results obtained from the user study, thereby further validating the robustness and effectiveness of our method in substantially reducing identity similarity across different evaluation paradigms.

### E.3. Ethics Statement

Our user study involved voluntary participation of adult subjects recruited within our institution. Participants were asked to provide subjective ratings of visual similarity without disclosing or providing any personally identifiable or sensitive information. The study used publicly available face datasets and collected no new identifiable personal data. All user evaluations were performed on synthetic or anonymized data, and no sensitive or personally identifiable information was recorded. The study posed no potential harm or risk to participants. While formal Institutional Review Board (IRB) approval was not required under our institution’s policy for this low-risk, anonymized perceptual

evaluation, all participants were informed about the study’s purpose and provided consent prior to participation. The study was conducted in accordance with recognized ethical research principles.

Table 3. Comparison of identity protection performance against baseline methods. Evaluation is conducted using three different identity similarity metrics: ArcFace, FaceNet, and VGGFace. “No Protected” denotes generation without defense.

| Method               | Ip-Adapter    |                |               | Ip-Adapter Plus XL |               |               | Blip-Diffusion |               |               | InfiniteID    |               |               |
|----------------------|---------------|----------------|---------------|--------------------|---------------|---------------|----------------|---------------|---------------|---------------|---------------|---------------|
|                      | Arc ↓         | Face ↓         | VGG ↓         | Arc ↓              | Face ↓        | VGG ↓         | Arc ↓          | Face ↓        | VGG ↓         | Arc ↓         | Face ↓        | VGG ↓         |
| <b>No Protected</b>  | 0.3369        | 0.4774         | 0.3308        | 0.4985             | 0.6899        | 0.5573        | 0.3305         | 0.3918        | 0.2848        | 0.6345        | 0.7627        | 0.6286        |
| <b>Anti-DB</b>       | 0.2525        | 0.3964         | 0.2715        | 0.4815             | 0.6419        | 0.5219        | 0.2685         | 0.3153        | 0.2286        | 0.5897        | 0.6859        | 0.5848        |
| <b>SimAC</b>         | 0.2048        | 0.4005         | 0.2792        | 0.3454             | 0.4634        | 0.3956        | 0.3238         | 0.3344        | 0.2563        | 0.5472        | 0.6670        | 0.5599        |
| <b>AdvDM</b>         | 0.2409        | 0.3624         | 0.2535        | 0.3427             | 0.4810        | 0.3700        | 0.2461         | 0.2989        | 0.2363        | 0.5069        | 0.6107        | 0.5087        |
| <b>ACE</b>           | 0.2573        | 0.4249         | 0.2996        | 0.4615             | 0.6377        | 0.5079        | 0.2738         | 0.3160        | 0.2336        | 0.5419        | 0.6489        | 0.5383        |
| <b>IDProtector</b>   | 0.2059        | 0.4167         | 0.2657        | 0.3324             | 0.5297        | 0.4120        | 0.2565         | 0.2967        | 0.2346        | 0.4972        | 0.7009        | 0.6112        |
| <b>IDGuar (Ours)</b> | <b>0.0673</b> | <b>-0.0226</b> | <b>0.0640</b> | <b>0.1296</b>      | <b>0.1231</b> | <b>0.1260</b> | <b>0.2255</b>  | <b>0.2376</b> | <b>0.1964</b> | <b>0.4121</b> | <b>0.5215</b> | <b>0.3990</b> |

  

| Method               | Photomaker    |               |               | Dreambooth    |               |               | InfiniteYou   |               |               | Mean          |               |               |
|----------------------|---------------|---------------|---------------|---------------|---------------|---------------|---------------|---------------|---------------|---------------|---------------|---------------|
|                      | Arc ↓         | Face ↓        | VGG ↓         | Arc ↓         | Face ↓        | VGG ↓         | Arc ↓         | Face ↓        | VGG ↓         | Arc ↓         | Face ↓        | VGG ↓         |
| <b>No Protected</b>  | 0.3488        | 0.3513        | 0.2806        | 0.4681        | 0.6580        | 0.4477        | 0.6788        | 0.7554        | 0.5847        | 0.4709        | 0.5838        | 0.4449        |
| <b>Anti-DB</b>       | 0.2331        | 0.3104        | 0.2716        | 0.3590        | 0.5420        | 0.3976        | 0.5867        | 0.6569        | 0.5343        | 0.3959        | 0.5070        | 0.4014        |
| <b>SimAC</b>         | 0.2267        | 0.2614        | 0.2564        | 0.2987        | 0.4760        | 0.3942        | 0.5604        | 0.6472        | 0.5039        | 0.3581        | 0.4643        | 0.3780        |
| <b>AdvDM</b>         | 0.2083        | 0.2189        | 0.2477        | <b>0.2191</b> | 0.4507        | <b>0.3327</b> | 0.5546        | 0.6309        | 0.4905        | 0.3312        | 0.4362        | 0.3485        |
| <b>ACE</b>           | 0.2246        | 0.2545        | 0.2756        | 0.3252        | 0.5328        | 0.4033        | 0.6450        | 0.7207        | 0.5504        | 0.3900        | 0.5051        | 0.4012        |
| <b>IDProtector</b>   | 0.2170        | 0.2212        | 0.2807        | 0.3372        | 0.4768        | 0.3932        | 0.5047        | 0.6067        | 0.5105        | 0.3358        | 0.4641        | 0.3868        |
| <b>IDGuar (Ours)</b> | <b>0.0747</b> | <b>0.1284</b> | <b>0.2239</b> | 0.2792        | <b>0.3893</b> | 0.3404        | <b>0.3230</b> | <b>0.3265</b> | <b>0.2522</b> | <b>0.2159</b> | <b>0.2434</b> | <b>0.2288</b> |

Table 4. Comparison of identity protection performance against baseline methods. Evaluation is conducted using FaceQNet and MagFace quality scores. “No Protected” denotes generation without defense.

| Method               | Ip-Adapter    |                | Ip-Adapter Plus XL |                | Blip-Diffusion |                | InfiniteID    |                |
|----------------------|---------------|----------------|--------------------|----------------|----------------|----------------|---------------|----------------|
|                      | FaceQNet ↓    | MagFace ↓      | FaceQNet ↓         | MagFace ↓      | FaceQNet ↓     | MagFace ↓      | FaceQNet ↓    | MagFace ↓      |
| <b>No Protected</b>  | 0.3339        | 21.3847        | 0.4564             | 19.3085        | 0.3305         | 21.8112        | 0.4946        | 19.0747        |
| <b>Anti-DB</b>       | 0.3045        | 21.1209        | 0.4553             | <b>18.4376</b> | 0.3565         | 20.8991        | 0.4957        | 18.9697        |
| <b>SimAC</b>         | 0.3124        | 20.8217        | 0.4492             | 18.9702        | 0.3628         | 21.4539        | <b>0.4844</b> | 19.0755        |
| <b>AdvDM</b>         | 0.3486        | 20.6235        | <b>0.4379</b>      | 18.8501        | 0.3547         | 21.6632        | 0.4896        | 18.9385        |
| <b>ACE</b>           | 0.3627        | 20.6235        | 0.4528             | 18.5293        | 0.3630         | 21.7078        | 0.4994        | 19.0961        |
| <b>IDProtector</b>   | 0.3367        | <b>19.9330</b> | 0.4318             | 18.8869        | 0.3680         | 21.3936        | 0.4885        | 18.9833        |
| <b>IDGuar (Ours)</b> | <b>0.2820</b> | 20.8712        | 0.4503             | 18.6099        | <b>0.3511</b>  | <b>20.8498</b> | 0.4938        | <b>18.9031</b> |

  

| Method               | Photomaker    |                | Dreambooth    |                | InfiniteYou   |                | Mean          |                |
|----------------------|---------------|----------------|---------------|----------------|---------------|----------------|---------------|----------------|
|                      | FaceQNet ↓    | MagFace ↓      |
| <b>No Protected</b>  | 0.4564        | 20.0541        | 0.3316        | 20.2766        | 0.4927        | 20.7298        | 0.4137        | 20.3771        |
| <b>Anti-DB</b>       | 0.2883        | 20.0427        | 0.3186        | 20.2498        | 0.4666        | 19.9501        | 0.3836        | 19.9529        |
| <b>SimAC</b>         | 0.2959        | 19.9726        | 0.3427        | 20.1656        | 0.4590        | 19.9077        | 0.3866        | 20.0525        |
| <b>AdvDM</b>         | 0.2934        | 20.1307        | <b>0.1921</b> | <b>19.7116</b> | 0.4586        | 19.9321        | 0.3678        | 19.9785        |
| <b>ACE</b>           | 0.2866        | 20.1201        | 0.2147        | 20.1827        | 0.4610        | 19.8904        | 0.3772        | 19.8786        |
| <b>IDProtector</b>   | 0.3119        | 28.5475        | 0.2248        | 20.6773        | 0.4535        | 19.5957        | 0.3736        | 21.1453        |
| <b>IDGuar (Ours)</b> | <b>0.2733</b> | <b>19.8202</b> | 0.2203        | 20.2199        | <b>0.4517</b> | <b>19.8111</b> | <b>0.3604</b> | <b>19.8693</b> |

Table 5. Ablation study of identity loss combinations and guidance directions, where **G adv** denotes guidance solely toward the adversarial identity distribution and **G clean** denotes guidance solely away from the clean identity distribution.

| Method                | Ip-Adapter    |                |               | Ip-Adapter Plus XL |               |               | Blip-Diffusion |               |               | InfiniteID    |               |               |
|-----------------------|---------------|----------------|---------------|--------------------|---------------|---------------|----------------|---------------|---------------|---------------|---------------|---------------|
|                       | Arc ↓         | Face ↓         | VGG ↓         | Arc ↓              | Face ↓        | VGG ↓         | Arc ↓          | Face ↓        | VGG ↓         | Arc ↓         | Face ↓        | VGG ↓         |
| <b>No Protected</b>   | 0.3369        | 0.4774         | 0.3308        | 0.4985             | 0.6899        | 0.5573        | 0.3305         | 0.3918        | 0.2848        | 0.6345        | 0.7627        | 0.6286        |
| <b>CLIP</b>           | 0.2289        | 0.3058         | 0.1949        | 0.2032             | 0.2328        | 0.2147        | 0.2864         | 0.3078        | 0.2664        | 0.5048        | 0.6775        | 0.5478        |
| <b>Facenet</b>        | 0.2412        | 0.2897         | 0.2058        | 0.2145             | 0.2281        | 0.2223        | 0.2948         | 0.2989        | 0.2716        | 0.5126        | 0.6843        | 0.5534        |
| <b>CLIP + Facenet</b> | 0.1578        | 0.2347         | 0.1326        | 0.1665             | 0.1707        | 0.1638        | 0.2534         | 0.2764        | 0.2355        | 0.4932        | 0.6047        | 0.5089        |
| <b>IDGuar (Ours)</b>  | <b>0.0673</b> | <b>-0.0226</b> | <b>0.0640</b> | <b>0.1296</b>      | <b>0.1231</b> | <b>0.1260</b> | <b>0.2255</b>  | <b>0.2376</b> | <b>0.1964</b> | <b>0.4121</b> | <b>0.5215</b> | <b>0.3990</b> |
| <b>G adv</b>          | 0.0688        | -0.0006        | 0.0650        | 0.1318             | 0.1476        | 0.1536        | 0.2971         | 0.3072        | 0.2509        | 0.4501        | 0.5369        | 0.4181        |
| <b>G clean</b>        | 0.0869        | -0.0061        | 0.0668        | 0.1442             | 0.1274        | 0.1432        | 0.2400         | 0.2751        | 0.2029        | 0.4265        | 0.5261        | 0.4073        |
| <b>IDGuar (Ours)</b>  | <b>0.0673</b> | <b>-0.0226</b> | <b>0.0640</b> | <b>0.1296</b>      | <b>0.1231</b> | <b>0.1260</b> | <b>0.2255</b>  | <b>0.2376</b> | <b>0.1964</b> | <b>0.4121</b> | <b>0.5215</b> | <b>0.3990</b> |

  

| Method                | Photomaker    |               |               | Dreambooth    |               |               | InfiniteYou   |               |               | Mean          |               |               |
|-----------------------|---------------|---------------|---------------|---------------|---------------|---------------|---------------|---------------|---------------|---------------|---------------|---------------|
|                       | Arc ↓         | Face ↓        | VGG ↓         | Arc ↓         | Face ↓        | VGG ↓         | Arc ↓         | Face ↓        | VGG ↓         | Arc ↓         | Face ↓        | VGG ↓         |
| <b>No Protected</b>   | 0.3488        | 0.3513        | 0.2806        | 0.4681        | 0.6580        | 0.4477        | 0.6788        | 0.7554        | 0.5847        | 0.4709        | 0.5838        | 0.4449        |
| <b>CLIP</b>           | 0.2465        | 0.2696        | 0.2757        | 0.4634        | 0.5890        | 0.4584        | 0.5273        | 0.6043        | 0.4599        | 0.3458        | 0.4210        | 0.3397        |
| <b>Facenet</b>        | 0.2593        | 0.2634        | 0.2810        | 0.4721        | 0.5743        | 0.4628        | 0.5345        | 0.5926        | 0.4658        | 0.3612        | 0.4188        | 0.3518        |
| <b>CLIP + Facenet</b> | 0.2056        | 0.2142        | 0.2202        | 0.4577        | 0.5606        | 0.4726        | 0.5032        | 0.5357        | 0.3932        | 0.3063        | 0.3577        | 0.2905        |
| <b>IDGuar (Ours)</b>  | <b>0.0747</b> | <b>0.1284</b> | <b>0.2239</b> | <b>0.2792</b> | <b>0.3893</b> | <b>0.3404</b> | <b>0.3230</b> | <b>0.3265</b> | <b>0.2522</b> | <b>0.2159</b> | <b>0.2434</b> | <b>0.2288</b> |
| <b>G adv</b>          | 0.1437        | 0.1477        | 0.2324        | 0.2796        | 0.4187        | 0.3432        | 0.3279        | 0.3405        | 0.2526        | 0.2427        | 0.2711        | 0.2451        |
| <b>G clean</b>        | 0.1562        | 0.1974        | 0.2333        | 0.3046        | 0.4813        | 0.3410        | 0.3379        | 0.3472        | 0.2565        | 0.2423        | 0.2783        | 0.2358        |
| <b>IDGuar (Ours)</b>  | <b>0.0747</b> | <b>0.1284</b> | <b>0.2239</b> | <b>0.2792</b> | <b>0.3893</b> | <b>0.3404</b> | <b>0.3230</b> | <b>0.3265</b> | <b>0.2522</b> | <b>0.2159</b> | <b>0.2434</b> | <b>0.2288</b> |

Table 6. Ablation study of different identity loss combinations and guidance directions. Evaluation is conducted using FaceQNet and MagFace to measure the perceptual quality of generated images.

| Method                | Ip-Adapter    |                | Ip-Adapter Plus XL |                | Blip-Diffusion |                | InfiniteID    |                |
|-----------------------|---------------|----------------|--------------------|----------------|----------------|----------------|---------------|----------------|
|                       | FaceQNet ↓    | MagFace ↓      | FaceQNet ↓         | MagFace ↓      | FaceQNet ↓     | MagFace ↓      | FaceQNet ↓    | MagFace ↓      |
| <b>No Protected</b>   | 0.3339        | 21.3847        | 0.4564             | 19.3085        | 0.3305         | 21.8112        | 0.4946        | 19.0747        |
| <b>CLIP</b>           | 0.3129        | 21.7832        | 0.4726             | 20.4175        | 0.3683         | 20.9487        | 0.5142        | 19.6254        |
| <b>Facenet</b>        | 0.3185        | 21.6910        | 0.4791             | 20.5083        | 0.3724         | <b>20.0284</b> | 0.5076        | 19.4939        |
| <b>CLIP + Facenet</b> | <b>0.2714</b> | 21.8426        | 0.4689             | 19.5268        | 0.3776         | 20.4123        | 0.5128        | 20.1884        |
| <b>IDGuar (Ours)</b>  | 0.2820        | <b>20.8712</b> | <b>0.4503</b>      | <b>18.6099</b> | <b>0.3511</b>  | 20.8498        | <b>0.4938</b> | <b>18.8031</b> |
| <b>G adv</b>          | 0.2900        | <b>20.8653</b> | 0.4603             | 19.2300        | 0.3569         | 20.7490        | <b>0.4899</b> | 19.0814        |
| <b>G clean</b>        | <b>0.2692</b> | 21.6448        | 0.4526             | 19.2488        | 0.3557         | <b>19.3413</b> | 0.4968        | 18.8645        |
| <b>IDGuar (Ours)</b>  | 0.2820        | 20.8712        | <b>0.4503</b>      | <b>18.6099</b> | <b>0.3511</b>  | 20.8498        | 0.4938        | <b>18.8031</b> |

  

| Method                | Photomaker    |                | Dreambooth    |                | InfiniteYou   |                | Mean          |                |
|-----------------------|---------------|----------------|---------------|----------------|---------------|----------------|---------------|----------------|
|                       | FaceQNet ↓    | MagFace ↓      |
| <b>No Protected</b>   | 0.4564        | 20.0541        | 0.3316        | 20.2766        | 0.4527        | 19.7298        | 0.4083        | 20.2342        |
| <b>CLIP</b>           | 0.3012        | 20.2741        | 0.3310        | <b>19.5135</b> | 0.4729        | <b>19.1276</b> | 0.3962        | 20.2414        |
| <b>Facenet</b>        | 0.3075        | 20.3417        | 0.3298        | 19.8824        | 0.4660        | 19.4059        | 0.3972        | 20.1930        |
| <b>CLIP + Facenet</b> | 0.2916        | 20.1042        | 0.2983        | 19.8631        | 0.4679        | 20.0893        | 0.3768        | 20.2895        |
| <b>IDGuar (Ours)</b>  | <b>0.2733</b> | <b>19.8202</b> | <b>0.2203</b> | 20.2199        | <b>0.4517</b> | 19.8111        | <b>0.3604</b> | <b>19.8693</b> |
| <b>G adv</b>          | 0.2813        | <b>19.7368</b> | 0.2754        | <b>19.9528</b> | 0.4536        | 20.2709        | 0.3725        | 19.9837        |
| <b>G clean</b>        | 0.2789        | 19.8856        | 0.2270        | 20.5887        | 0.4519        | 20.3764        | 0.3617        | 19.9929        |
| <b>IDGuar (Ours)</b>  | <b>0.2733</b> | 19.8202        | <b>0.2203</b> | 20.2199        | <b>0.4517</b> | <b>19.8111</b> | <b>0.3604</b> | <b>19.8693</b> |

Table 7. Robustness evaluation against common image post-processing operations, including JPEG compression, Gaussian blur, and Gaussian noise, and attacks targeting active defenses such as Impress.

| Method        | Ip-Adapter    |                |               | Ip-Adapter Plus XL |               |               | Blip-Diffusion |               |               | InfiniteID    |               |               |
|---------------|---------------|----------------|---------------|--------------------|---------------|---------------|----------------|---------------|---------------|---------------|---------------|---------------|
|               | Arc ↓         | Face ↓         | VGG ↓         | Arc ↓              | Face ↓        | VGG ↓         | Arc ↓          | Face ↓        | VGG ↓         | Arc ↓         | Face ↓        | VGG ↓         |
| No Protected  | 0.3369        | 0.4774         | 0.3308        | 0.4985             | 0.6899        | 0.5573        | 0.3305         | 0.3918        | 0.2848        | 0.6345        | 0.7627        | 0.6286        |
| JPEG          | 0.1068        | 0.1900         | 0.1263        | 0.3209             | 0.3983        | 0.3006        | 0.2236         | 0.2196        | 0.2026        | 0.4286        | 0.5158        | 0.4062        |
| Blur          | 0.1678        | 0.2948         | 0.1967        | 0.3317             | 0.4443        | 0.3520        | 0.2663         | 0.2663        | 0.2077        | <b>0.3854</b> | <b>0.4780</b> | <b>0.3734</b> |
| Noise         | 0.1365        | 0.1794         | 0.1295        | 0.3078             | 0.3970        | 0.3113        | <b>0.1916</b>  | <b>0.1910</b> | <b>0.1716</b> | 0.4482        | 0.5581        | 0.4391        |
| Impress       | 0.1018        | 0.1696         | 0.1230        | 0.3184             | 0.3735        | 0.2956        | 0.2261         | 0.2653        | 0.2277        | 0.4478        | 0.5309        | 0.4074        |
| IDGuar (Ours) | <b>0.0673</b> | <b>-0.0226</b> | <b>0.0640</b> | <b>0.1296</b>      | <b>0.1231</b> | <b>0.1260</b> | 0.2255         | 0.2376        | 0.1964        | 0.4121        | 0.5215        | 0.3990        |

  

| Method        | Photomaker    |               |               | Dreambooth    |               |               | InfiniteYou   |               |               | Mean          |               |               |
|---------------|---------------|---------------|---------------|---------------|---------------|---------------|---------------|---------------|---------------|---------------|---------------|---------------|
|               | Arc ↓         | Face ↓        | VGG ↓         | Arc ↓         | Face ↓        | VGG ↓         | Arc ↓         | Face ↓        | VGG ↓         | Arc ↓         | Face ↓        | VGG ↓         |
| No Protected  | 0.3488        | 0.3513        | 0.2806        | 0.4681        | 0.6580        | 0.4477        | 0.6788        | 0.7554        | 0.5847        | 0.4709        | 0.5838        | 0.4449        |
| JPEG          | 0.1199        | <b>0.0754</b> | 0.2082        | 0.2723        | 0.3963        | <b>0.3267</b> | 0.3344        | 0.3728        | 0.2590        | 0.2581        | 0.3097        | 0.2614        |
| Blur          | <b>0.0709</b> | 0.1591        | 0.2102        | 0.2899        | 0.5136        | 0.4110        | 0.3371        | 0.3510        | 0.2587        | 0.2642        | 0.3582        | 0.2871        |
| Noise         | 0.1785        | 0.1618        | <b>0.1971</b> | 0.3418        | 0.5177        | 0.3844        | 0.3410        | 0.3625        | 0.2623        | 0.2780        | 0.3382        | 0.2708        |
| Impress       | 0.1910        | 0.1494        | 0.2097        | <b>0.2516</b> | 0.4479        | 0.3386        | <b>0.3166</b> | <b>0.3233</b> | <b>0.2387</b> | 0.2648        | 0.3229        | 0.2629        |
| IDGuar (Ours) | 0.0747        | 0.1284        | 0.2239        | 0.2792        | <b>0.3893</b> | 0.3404        | 0.3230        | 0.3265        | 0.2522        | <b>0.2159</b> | <b>0.2434</b> | <b>0.2288</b> |

Table 8. Robustness evaluation against common image post-processing operations. Evaluation is conducted using FaceQNet and MagFace to measure the perceptual quality of generated images.

| Method        | Ip-Adapter    |                | Ip-Adapter Plus XL |                | Blip-Diffusion |                | InfiniteID    |                |
|---------------|---------------|----------------|--------------------|----------------|----------------|----------------|---------------|----------------|
|               | FaceQNet ↓    | MagFace ↓      | FaceQNet ↓         | MagFace ↓      | FaceQNet ↓     | MagFace ↓      | FaceQNet ↓    | MagFace ↓      |
| No Protected  | 0.3339        | 21.3847        | 0.4564             | 19.3085        | 0.3305         | 21.8112        | 0.4946        | 19.0747        |
| JPEG          | <b>0.2211</b> | 21.3679        | 0.4539             | 18.5163        | 0.3233         | 21.7881        | 0.4918        | <b>18.8227</b> |
| Blur          | 0.3211        | 21.3901        | 0.4667             | 19.7750        | <b>0.2895</b>  | <b>19.8607</b> | 0.5031        | 18.8229        |
| Noise         | 0.2499        | <b>20.6822</b> | 0.4497             | <b>18.4623</b> | 0.3460         | 20.6286        | 0.5016        | 19.0230        |
| Impress       | 0.2501        | 20.7604        | <b>0.4270</b>      | 19.6015        | 0.3353         | 20.9642        | 0.4935        | 19.1813        |
| IDGuar (Ours) | 0.2820        | 20.8712        | 0.4503             | 18.5099        | 0.3511         | 20.8498        | <b>0.4908</b> | 18.9031        |

  

| Method        | Photomaker    |                | Dreambooth    |                | InfiniteYou   |                | Mean          |                |
|---------------|---------------|----------------|---------------|----------------|---------------|----------------|---------------|----------------|
|               | FaceQNet ↓    | MagFace ↓      |
| No Protected  | 0.4564        | 20.0541        | 0.3316        | 20.2766        | 0.4527        | 19.7298        | 0.4080        | 20.2342        |
| JPEG          | 0.2743        | <b>19.6998</b> | 0.2535        | 20.5918        | 0.4544        | 20.0803        | <b>0.3532</b> | 19.9809        |
| Blur          | 0.2754        | 19.8549        | 0.2814        | 19.6256        | <b>0.4483</b> | 20.0016        | 0.3694        | 19.9044        |
| Noise         | 0.2809        | 19.8303        | 0.3583        | <b>19.2192</b> | 0.4528        | 19.8165        | 0.3770        | <b>19.6660</b> |
| Impress       | 0.2762        | 20.0743        | 0.2475        | 21.0550        | 0.4536        | <b>19.6948</b> | 0.3547        | 20.1902        |
| IDGuar (Ours) | <b>0.2733</b> | 19.8202        | <b>0.2203</b> | 20.2199        | 0.4517        | 19.8111        | 0.3604        | 19.8693        |

Table 9. Comparison of identity protection performance against baseline methods on the CelebA-HQ dataset. Evaluation is conducted using three widely adopted identity similarity metrics: ArcFace, FaceNet, and VGGFace.

| Method               | Ip-Adapter    |               |               | Ip-Adapter Plus XL |               |               | Blip-Diffusion |               |               | InfiniteID    |               |               |
|----------------------|---------------|---------------|---------------|--------------------|---------------|---------------|----------------|---------------|---------------|---------------|---------------|---------------|
|                      | Arc ↓         | Face ↓        | VGG ↓         | Arc ↓              | Face ↓        | VGG ↓         | Arc ↓          | Face ↓        | VGG ↓         | Arc ↓         | Face ↓        | VGG ↓         |
| <b>No Protected</b>  | 0.4104        | 0.4714        | 0.3764        | 0.5706             | 0.7152        | 0.6062        | 0.2862         | 0.3495        | 0.3061        | 0.6352        | 0.6886        | 0.5642        |
| <b>Anti-DB</b>       | 0.3061        | 0.3647        | 0.3193        | 0.4940             | 0.6321        | 0.5260        | 0.2257         | 0.3369        | 0.2894        | 0.5344        | 0.5946        | 0.5031        |
| <b>SimAC</b>         | 0.2398        | 0.3390        | 0.3021        | 0.4049             | 0.5131        | 0.4339        | 0.2499         | 0.3240        | 0.2849        | 0.4483        | 0.5262        | 0.4455        |
| <b>AdvDM</b>         | 0.2827        | 0.3907        | 0.3125        | 0.4158             | 0.5007        | 0.4464        | 0.2222         | 0.3484        | 0.2680        | 0.5056        | 0.5435        | 0.4669        |
| <b>ACE</b>           | 0.3462        | 0.4354        | 0.3505        | 0.5412             | 0.6673        | 0.5834        | 0.2418         | 0.3422        | 0.2880        | 0.4813        | 0.5480        | 0.4839        |
| <b>IDProtector</b>   | 0.2543        | 0.3071        | 0.2922        | 0.4363             | 0.5421        | 0.4486        | 0.1881         | <b>0.3003</b> | <b>0.2256</b> | 0.5065        | 0.6161        | 0.5611        |
| <b>IDGuar (Ours)</b> | <b>0.1003</b> | <b>0.0515</b> | <b>0.0940</b> | <b>0.2686</b>      | <b>0.2905</b> | <b>0.2385</b> | <b>0.1794</b>  | 0.3061        | 0.2431        | <b>0.3469</b> | <b>0.4198</b> | <b>0.3489</b> |

  

| Method               | Photomaker    |               |               | Dreambooth    |               |               | InfiniteYou   |               |               | Mean          |               |               |
|----------------------|---------------|---------------|---------------|---------------|---------------|---------------|---------------|---------------|---------------|---------------|---------------|---------------|
|                      | Arc ↓         | Face ↓        | VGG ↓         | Arc ↓         | Face ↓        | VGG ↓         | Arc ↓         | Face ↓        | VGG ↓         | Arc ↓         | Face ↓        | VGG ↓         |
| <b>No Protected</b>  | 0.6934        | 0.4219        | 0.2612        | 0.5421        | 0.6555        | 0.4335        | 0.6614        | 0.7485        | 0.5640        | 0.5428        | 0.5787        | 0.4445        |
| <b>Anti-DB</b>       | 0.6504        | 0.4065        | 0.2560        | 0.1031        | 0.0666        | 0.0761        | 0.6035        | 0.6869        | 0.5312        | 0.4167        | 0.4412        | 0.3573        |
| <b>SimAC</b>         | 0.6251        | 0.3564        | 0.2321        | <b>0.0831</b> | 0.0852        | 0.0665        | 0.5854        | 0.6846        | 0.4654        | 0.3766        | 0.4041        | 0.3186        |
| <b>AdvDM</b>         | 0.6313        | 0.3718        | 0.2672        | 0.0868        | 0.0365        | 0.1100        | 0.5207        | 0.6293        | 0.4654        | 0.3807        | 0.4030        | 0.3338        |
| <b>ACE</b>           | 0.6422        | 0.3880        | 0.2384        | 0.1401        | 0.2271        | 0.0944        | 0.6358        | 0.7283        | 0.5560        | 0.4327        | 0.4766        | 0.3707        |
| <b>IDProtector</b>   | 0.6151        | 0.3013        | 0.2022        | 0.3298        | 0.3727        | 0.2578        | 0.5617        | 0.6609        | 0.4943        | 0.4131        | 0.4429        | 0.3545        |
| <b>IDGuar (Ours)</b> | <b>0.3320</b> | <b>0.2654</b> | <b>0.1996</b> | 0.0838        | <b>0.0320</b> | <b>0.0610</b> | <b>0.3331</b> | <b>0.3871</b> | <b>0.2428</b> | <b>0.2349</b> | <b>0.2503</b> | <b>0.2040</b> |

Table 10. Comparison of identity protection performance against baseline methods on the CelebA-HQ dataset. Evaluation is conducted using FaceQNet and MagFace to measure the perceptual quality of generated images.

| Method        | Ip-Adapter    |                | Ip-Adapter Plus XL |                | Blip-Diffusion |                | InfiniteID    |                |
|---------------|---------------|----------------|--------------------|----------------|----------------|----------------|---------------|----------------|
|               | FaceQNet ↓    | MagFace ↓      | FaceQNet ↓         | MagFace ↓      | FaceQNet ↓     | MagFace ↓      | FaceQNet ↓    | MagFace ↓      |
| No Protected  | 0.3031        | 20.6785        | 0.4490             | 18.8023        | 0.3344         | 20.9884        | 0.4527        | 19.6607        |
| Anti-DB       | 0.2599        | <b>19.5696</b> | 0.4515             | <b>18.5281</b> | 0.3170         | 21.4418        | 0.4731        | 18.9686        |
| SimAC         | 0.2670        | 19.9800        | 0.4493             | 19.2084        | 0.3433         | <b>19.4777</b> | 0.4695        | 19.0426        |
| AdvDM         | 0.2842        | 19.9800        | 0.4505             | 19.2084        | <b>0.2941</b>  | 20.0386        | 0.4645        | 19.2935        |
| ACE           | 0.2928        | 20.0025        | 0.4540             | 19.3925        | 0.3363         | 20.7060        | 0.4539        | 19.1724        |
| IDProtector   | 0.2945        | 20.0540        | 0.4544             | 19.0985        | 0.3039         | 20.4320        | <b>0.4204</b> | 19.7844        |
| IDGuar (Ours) | <b>0.2556</b> | 19.9783        | <b>0.4490</b>      | 18.7536        | 0.3098         | 20.6180        | 0.4574        | <b>18.7834</b> |

  

| Method        | Photomaker    |                | Dreambooth    |                | InfiniteYou   |                | Mean          |                |
|---------------|---------------|----------------|---------------|----------------|---------------|----------------|---------------|----------------|
|               | FaceQNet ↓    | MagFace ↓      |
| No Protected  | 0.2674        | 20.5900        | 0.3222        | 21.1998        | 0.4463        | 19.4956        | 0.3679        | 20.2022        |
| Anti-DB       | 0.2693        | <b>20.4309</b> | 0.2802        | 21.8453        | 0.4451        | 19.6502        | 0.3566        | 20.0621        |
| SimAC         | 0.2693        | 20.5074        | 0.2650        | 21.6122        | 0.4489        | 19.7678        | 0.3589        | 19.9423        |
| AdvDM         | 0.2672        | 20.5074        | 0.3072        | 21.3755        | 0.4418        | 19.7678        | 0.3585        | 20.0245        |
| ACE           | 0.2677        | 20.7290        | <b>0.2501</b> | 21.5659        | 0.4463        | 19.4555        | 0.3573        | 20.1463        |
| IDProtector   | 0.2907        | 28.8511        | 0.3740        | 20.0474        | 0.4565        | 21.7575        | 0.3706        | 21.4321        |
| IDGuar (Ours) | <b>0.2653</b> | 20.5549        | 0.3073        | <b>21.2664</b> | <b>0.4352</b> | <b>19.3972</b> | <b>0.3542</b> | <b>19.9074</b> |

Table 11. ArcFace-only identity similarity on LFW. Method names are abbreviated for brevity.

| Method        | IP-Adapter ↓  | IP-Ada. + XL ↓ | BLIP-D. ↓     | InfiniteID ↓  | PhotoM. ↓     | DreamB. ↓     | InfiniteYou ↓ | Mean ↓        |
|---------------|---------------|----------------|---------------|---------------|---------------|---------------|---------------|---------------|
| No Protected  | 0.3580        | 0.5210         | 0.3010        | 0.6150        | 0.3420        | 0.4550        | 0.6670        | 0.4656        |
| Anti-DB       | 0.2550        | 0.4890         | 0.2490        | 0.5720        | 0.2300        | 0.3380        | 0.5980        | 0.3901        |
| SimAC         | 0.2070        | 0.3620         | 0.2760        | 0.5490        | 0.2200        | 0.2870        | 0.5570        | 0.3511        |
| AdvDM         | 0.2320        | 0.3480         | 0.2410        | 0.5030        | 0.2050        | 0.2540        | 0.5410        | 0.3320        |
| ACE           | 0.2480        | 0.4620         | 0.2610        | 0.5330        | 0.2270        | 0.3210        | 0.6400        | 0.3846        |
| IDProtector   | 0.2130        | 0.3310         | 0.2380        | 0.4920        | 0.2180        | 0.3160        | 0.5090        | 0.3310        |
| IDGuar (Ours) | <b>0.0790</b> | <b>0.1360</b>  | <b>0.1980</b> | <b>0.4050</b> | <b>0.0910</b> | <b>0.2520</b> | <b>0.3180</b> | <b>0.2113</b> |

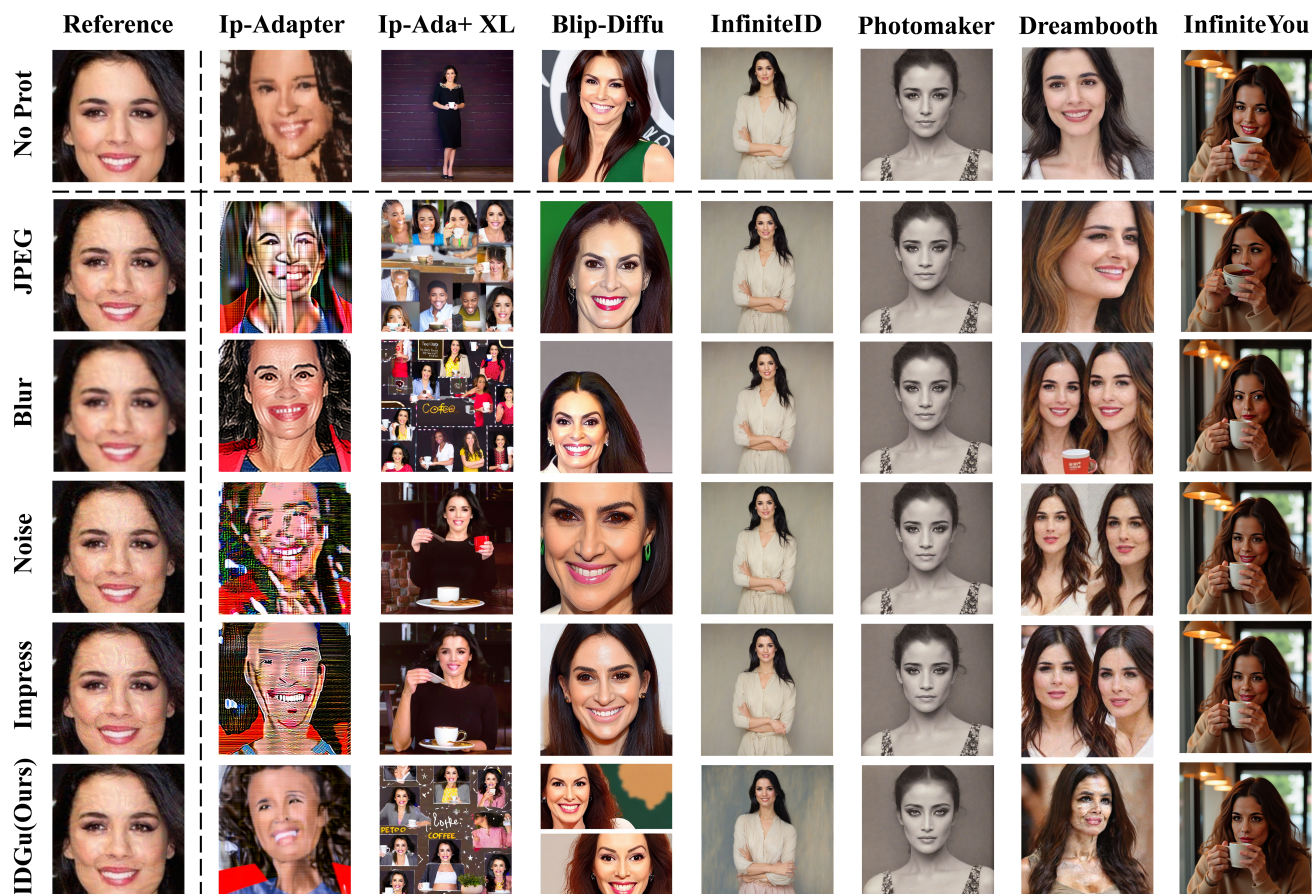

Figure 8. Robustness Evaluation Against Image Post-Processing and Defense Attacks.

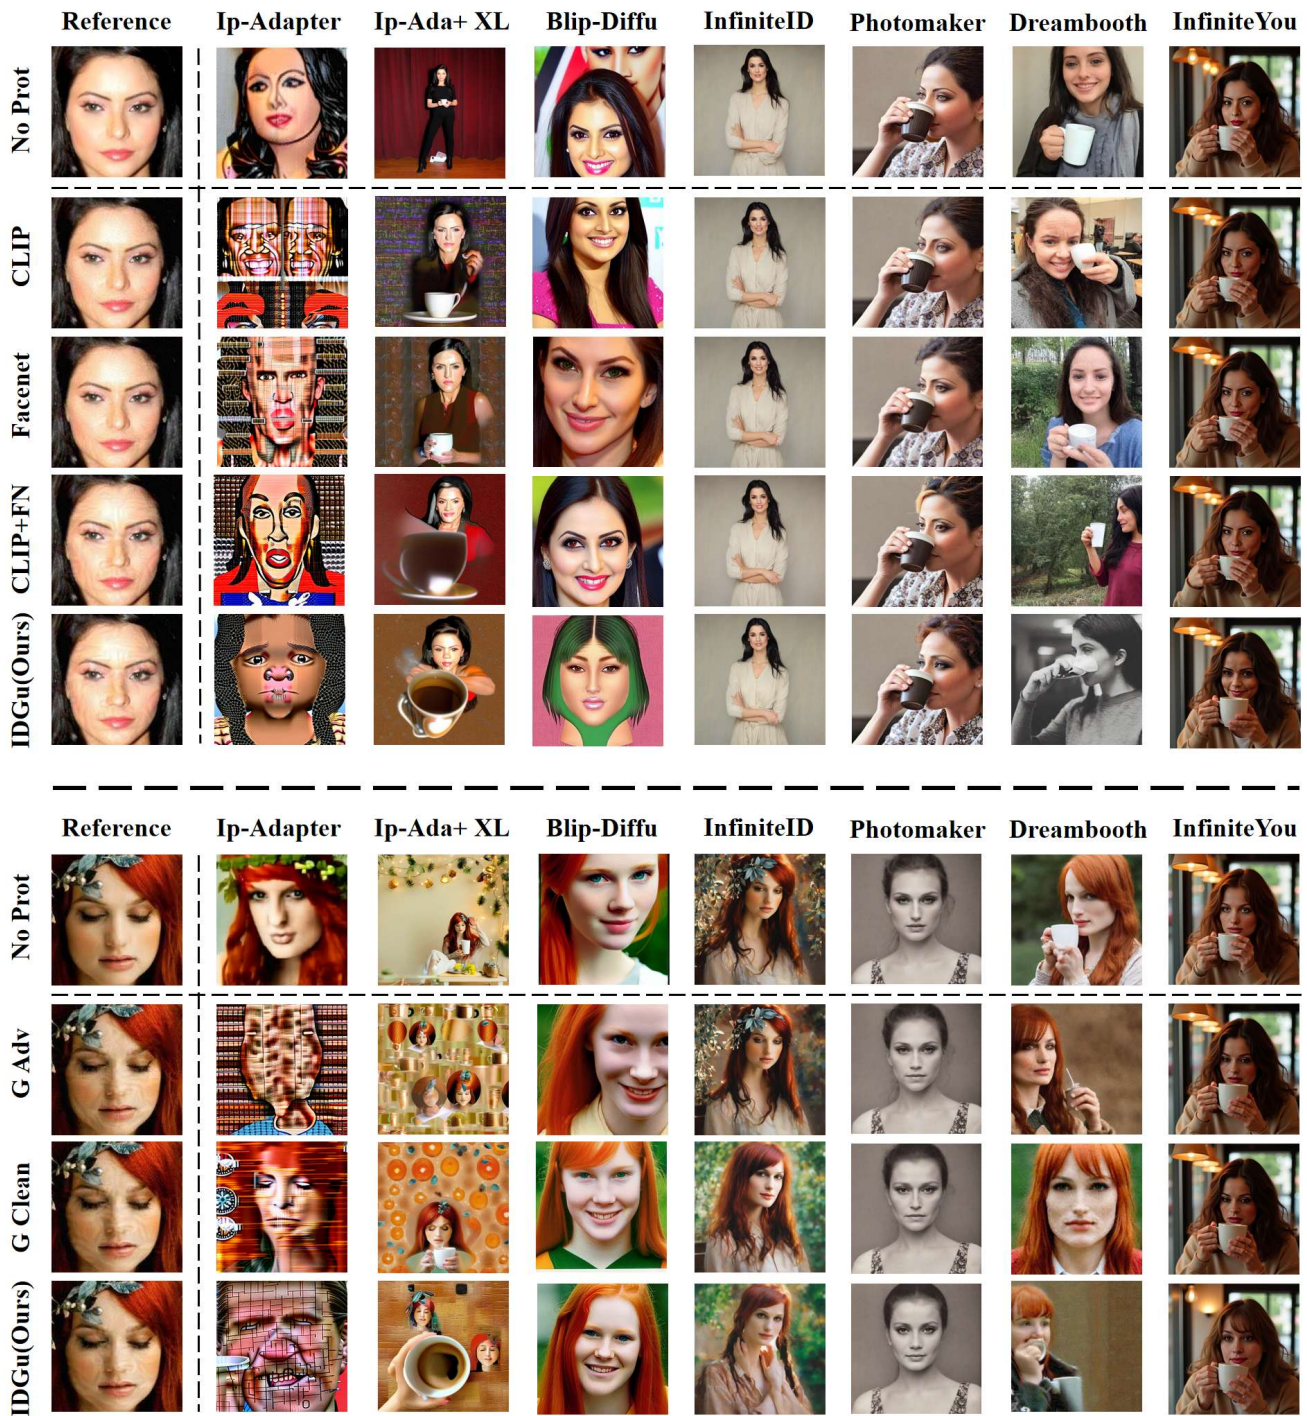

Figure 9. Visualization of the ablation study on identity loss combinations and guidance directions.

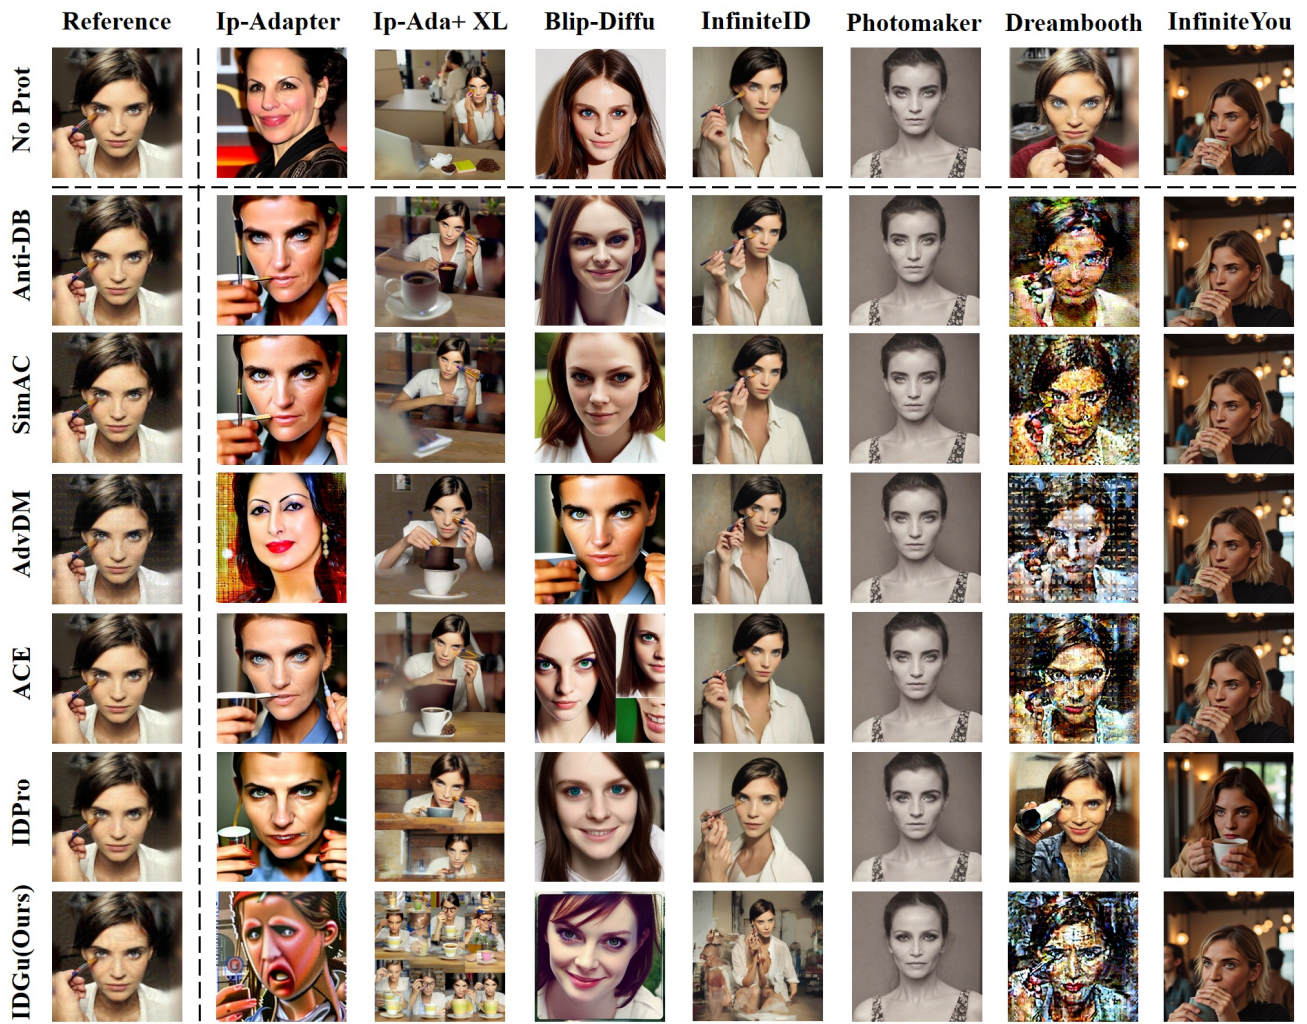

Figure 10. Visualization of Identity Suppression Effectiveness on CelebA-HQ Dataset for IDGuardian and Comparison Methods.
